# Supplementary material for: Identification of Degradation Mechanisms by Post-Mortem Analysis for High Power and High Energy Commercial Li-Ion Cells after Electric Vehicle Aging
Source: MDPI journal article supplement (doi:10.3390/batteries7030048), 2021-07-16
Supplement: s1 [file s1]

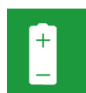

Supplementary data

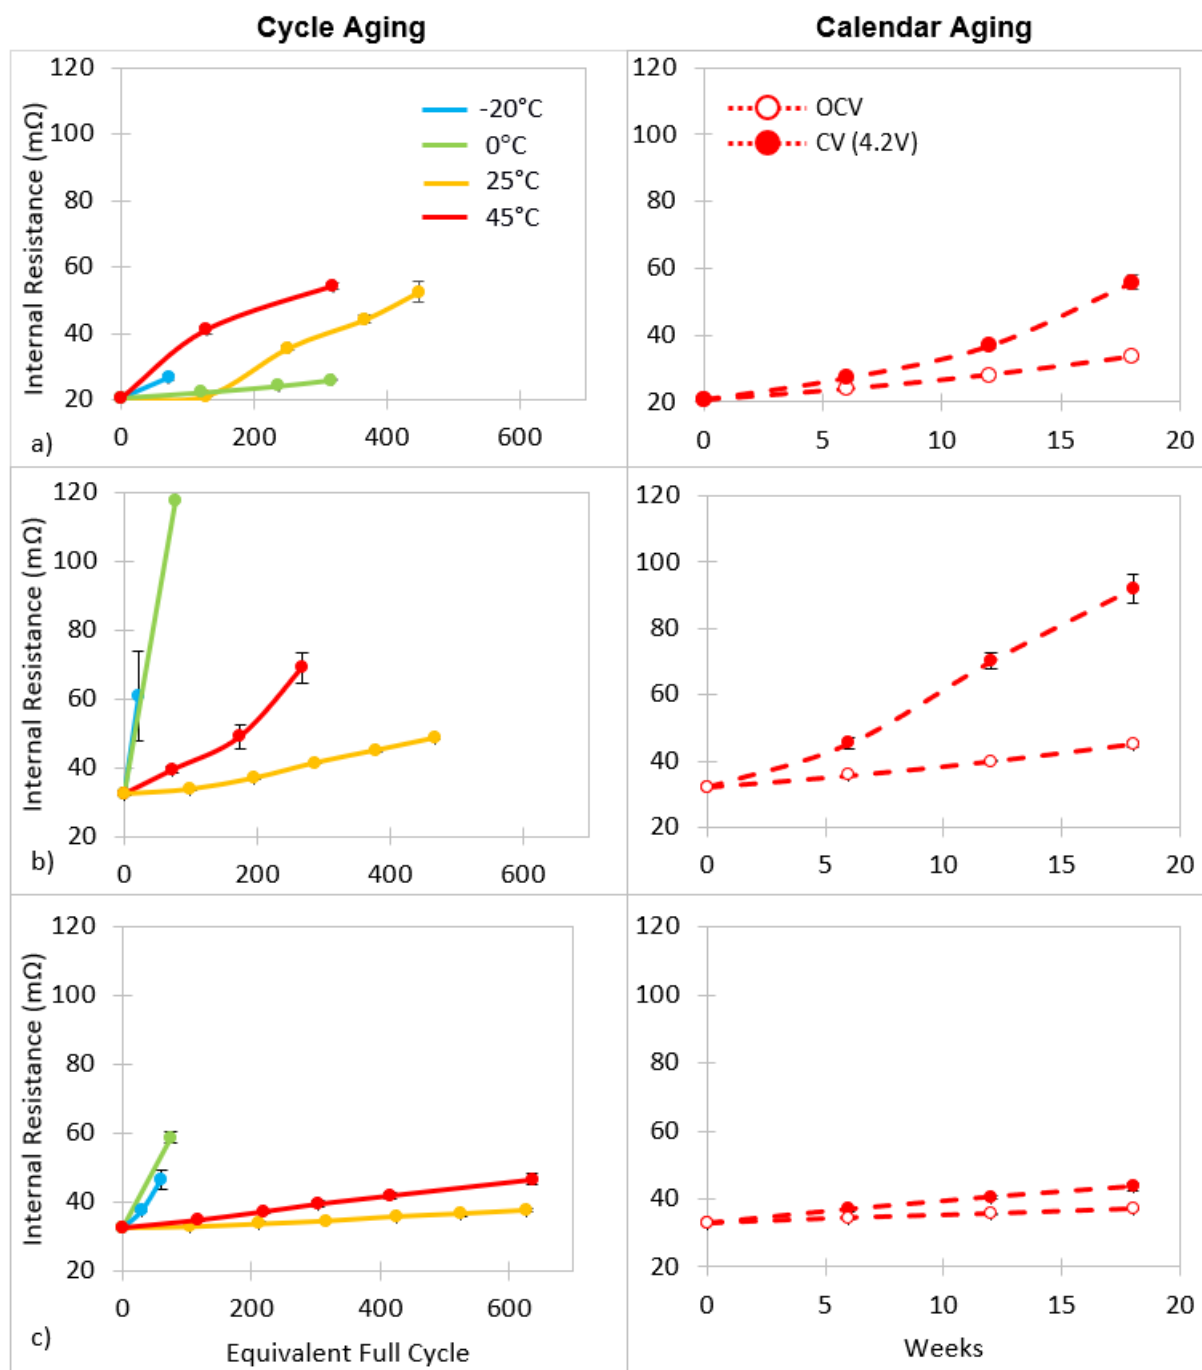

**Figure S1.** Internal resistance evolution of a) 30Q, b) 32E and c) 35E cells during their cycle (left curves) and calendar (right curves) aging. Internal resistance was measured with the voltage drop at the end of a 10 s current pulse at  $I_{max}$ .

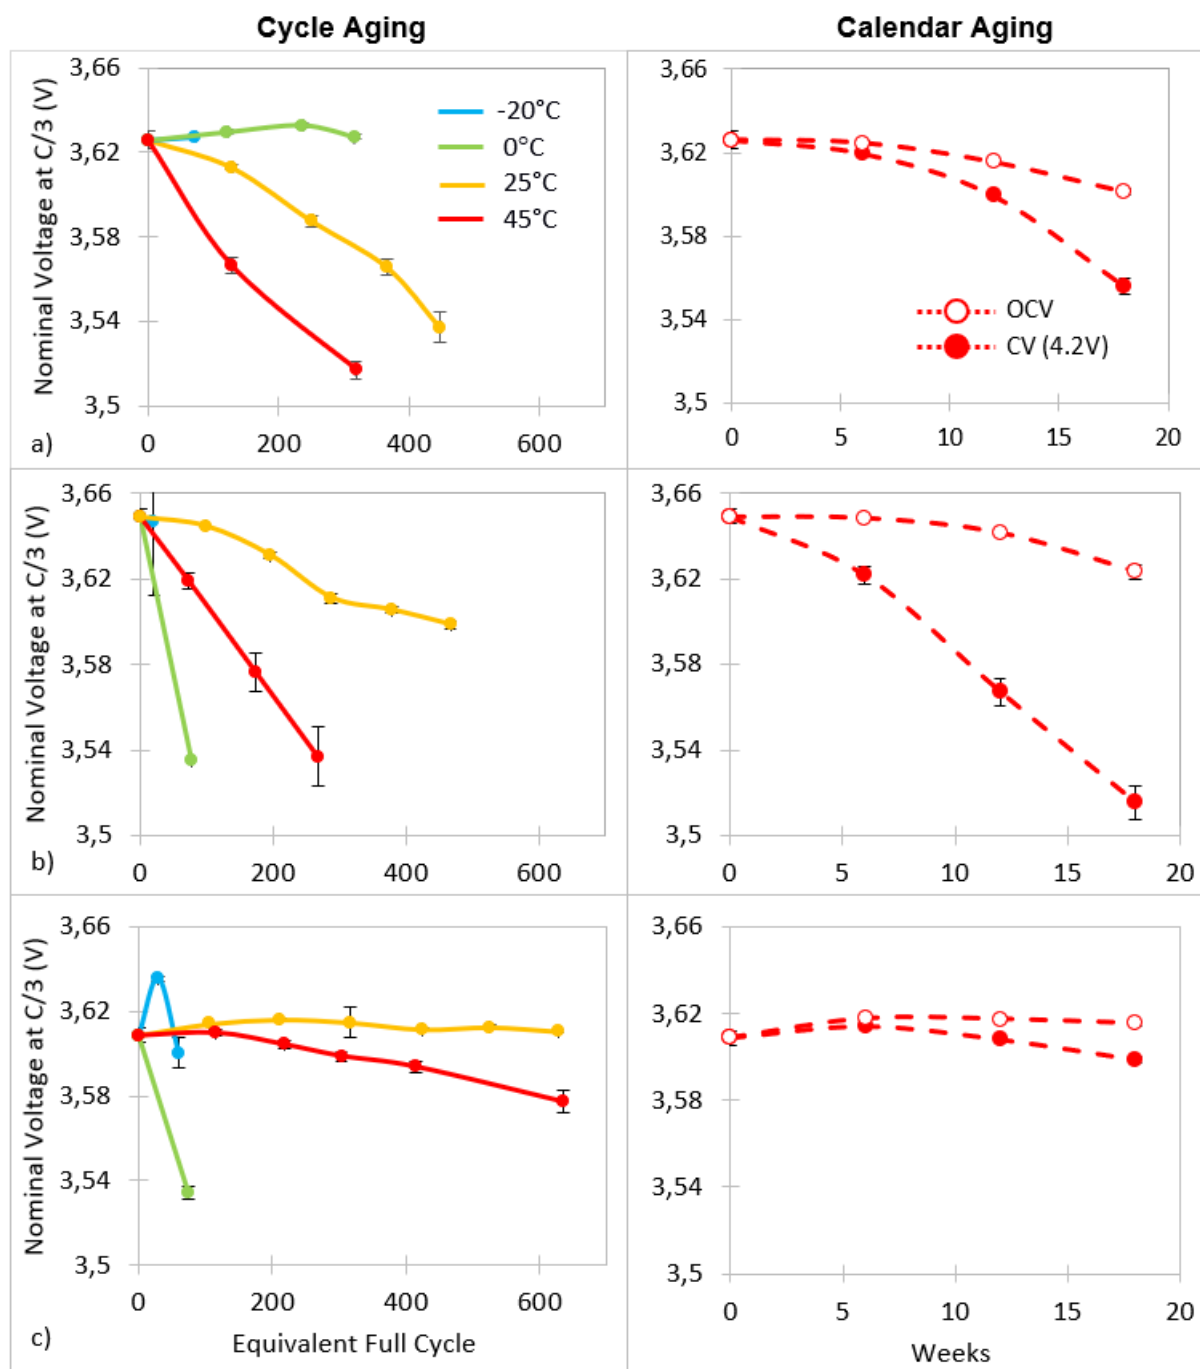

**Figure S2.** Nominal Voltage evolution of a) 30Q, b) 32E and c) 35E cells during their cycle (left curves) and calendar (right curves) aging.
